# Supplementary material
Source: publisher figshare collection journal article supplement (https://gsajournals.figshare.com/ndownloader/files/16236671)
Supplement: Supplementary file 1 [file 16236671]

**Supplementary Figure 1** Variants rs319044994 and rs333021601 as fixed effects for the traits BFT and CRCL.

**Supplementary Figure 2** Quantile-quantile plots of p-values from GWAS for ADG, BFT, CRCL, and MFR. Lambda values were calculated as a measure of association between observed and expected p-values.
